# Supplementary material
Source: PubMed Central journal article supplement (PMC5266146)
Supplement: mmc1.pdf [file mmc1.pdf]

**Biophysical Journal, Volume 112**

**Supplemental Information**

**Stabilization of the Activated hERG Channel Voltage Sensor by Depolarization Involves the S4-S5 Linker**

**Samrat Thouta, Christina M. Hull, Yu Patrick Shi, Valentine Sergeev, James Young, Yen M. Cheng, and Thomas W. Claydon**

## **Supplementary Material**

### **Stabilization of the activated hERG channel voltage sensor by depolarization involves the S4-S5 linker**

Running title: Stabilization of the activated hERG voltage sensor

Thouta, S.\*, Hull, C.M.\*, Shi, Y.P., Sergeev, V., Young, J., Cheng, Y.M., T.W. Claydon

\*these authors contributed equally

Department of Biomedical Physiology and Kinesiology,  
Simon Fraser University, Burnaby. B.C., Canada

Key words: hERG, voltage sensor, deactivation, relaxation, mode-shift, S4-S5 linker

Address correspondence to Dr. Tom W. Claydon, Department of Biomedical Physiology and Kinesiology, Simon Fraser University, 8888 University Drive, Burnaby, B.C. V5A 1S6, Canada.  
Tel: (778) 782-8514. Fax: (778) 782-3040. E-mail: [thomas\\_claydon@sfu.ca](mailto:thomas_claydon@sfu.ca)

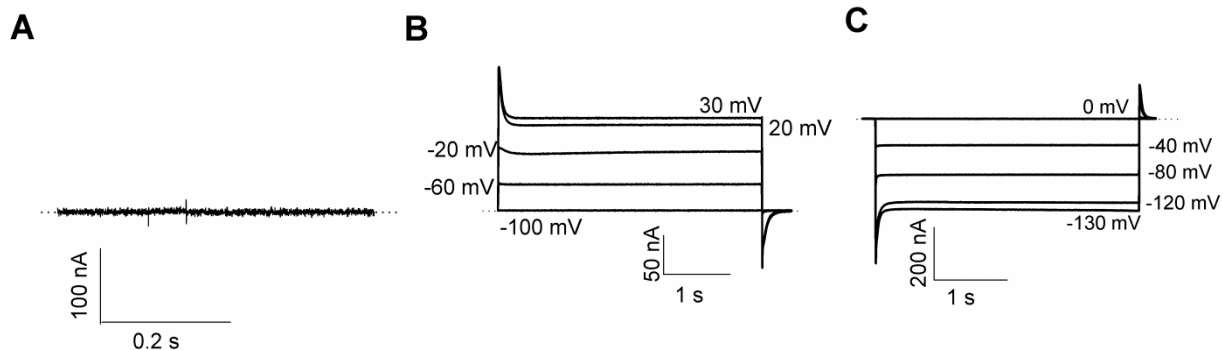

**FIGURE S1**

**FIGURE S1. Gating current recordings from WT channels and un-injected oocytes (A)** Representative leak and capacity subtracted currents recorded from un-injected oocyte in response to a -100 mV step from a holding potential of 0 mV. **(B and C)** Non-leak subtracted WT hERG currents recorded in response to depolarization **(B)** and repolarization **(C)** to the indicated voltages from a holding potential of -100 mV and 0 mV respectively.

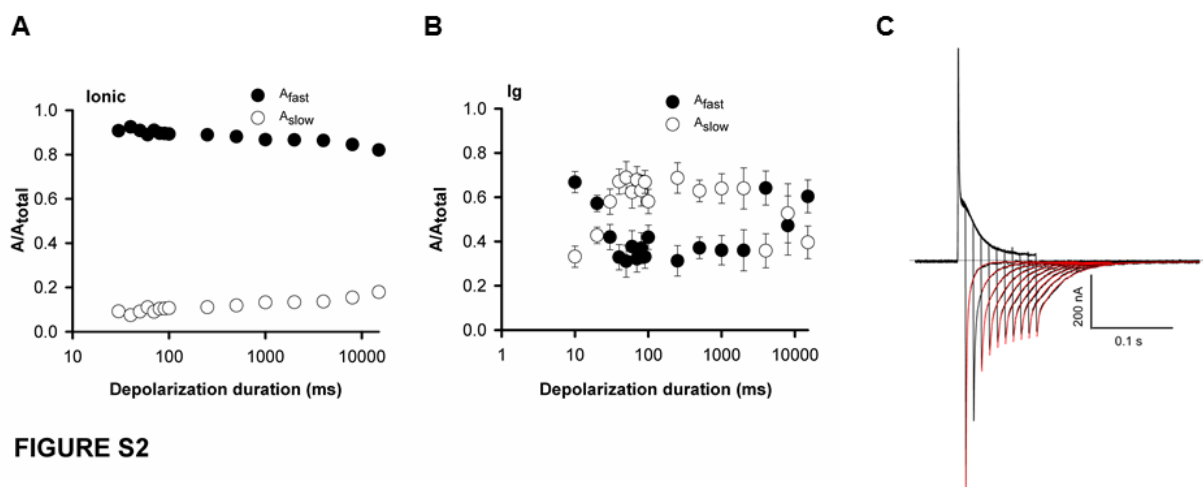

**FIGURE S2**

**FIGURE S2 Dependence of relative amplitudes of the fast and slow phases of current decay on pre-pulse duration. (A and B)** Plot of mean relative amplitudes of the phases of deactivating **(A)** and off-gating current decay **(B)** measured at -110 mV against depolarizing step duration. **(C)** Representative hERG WT gating current traces as in Figure 2B inset showing double-exponential fits (red lines) of off-gating current decays.

**TABLE S1 Activation and deactivation GV Boltzmann fit parameters for hERG  $\Delta$ 2-135 channels with different depolarizing step durations ( $\Delta t$ )**

| $\Delta t$ (s) | Activation GV   |                |   | Deactivation GV |                |   |
|----------------|-----------------|----------------|---|-----------------|----------------|---|
|                | $V_h$ (mV)      | k (mV)         | n | $V_h$ (mV)      | k (mV)         | n |
| 0.25           | $-6.7 \pm 2.1$  | $10.6 \pm 0.6$ | 5 | -               | -              | - |
| 0.5            | $-13.8 \pm 1.3$ | $8.4 \pm 0.4$  | 5 | $-34.3 \pm 1.2$ | $16.2 \pm 1.5$ | 5 |
| 1              | $-17.3 \pm 0.6$ | $7.2 \pm 0.3$  | 5 | $-29.7 \pm 1.0$ | $12.7 \pm 0.5$ | 5 |
| 2              | $-19.4 \pm 0.4$ | $6.6 \pm 0.4$  | 5 | $-24.7 \pm 0.9$ | $9.1 \pm 0.8$  | 5 |
| 4              | $-19.9 \pm 0.5$ | $6.5 \pm 0.4$  | 5 | $-23.2 \pm 0.5$ | $9.4 \pm 0.9$  | 5 |
| 8              | $-19.7 \pm 0.8$ | $6.4 \pm 0.5$  | 5 | $-24.9 \pm 1.3$ | $9.4 \pm 0.5$  | 5 |

**TABLE S2 Activation and deactivation GV Boltzmann fit parameters for hERG S3-S4 and S1-S2 linker mutant channels**

|           | Activation GV   |                |   | Deactivation GV |                |   | Mode-shift      |   |
|-----------|-----------------|----------------|---|-----------------|----------------|---|-----------------|---|
|           | $V_h$ (mV)      | k (mV)         | n | $V_h$ (mV)      | k (mV)         | n | $V_h$ (mV)      | n |
| WT hERG   | $-21.5 \pm 0.5$ | $7.9 \pm 0.1$  | 5 | $-52.8 \pm 1.7$ | $8.1 \pm 0.3$  | 5 | $-31.3 \pm 2.0$ | 5 |
| hERG/Sh   | $-34.1 \pm 0.7$ | $8.0 \pm 0.2$  | 5 | $-68.1 \pm 1.0$ | $7.8 \pm 0.3$  | 5 | $-34.5 \pm 1.2$ | 5 |
| hERG 9G   | $-33.3 \pm 2.2$ | $11.2 \pm 0.3$ | 4 | $-62.0 \pm 2.8$ | $11.2 \pm 0.4$ | 4 | $-28.8 \pm 1.1$ | 4 |
| ETEE/QQQQ | $-35.8 \pm 2.6$ | $8.9 \pm 0.9$  | 5 | $-59.3 \pm 4.0$ | $7.3 \pm 0.9$  | 5 | $-24.5 \pm 2.9$ | 5 |

To compare the effect of mutations on the extent of mode-shift, activation and deactivation were measured using non-steady-state durations. Activation GV relations were collected from oocytes held at -80 mV and subjected to 2 s depolarizing steps to +50 mV in 10 mV increments followed by a 2 s step to -110 mV. Deactivation GV relations were collected from oocytes held at -80 mV and subjected to a 500 ms depolarizing step +60 mV followed by 8 s steps from -110 mV to +40 mV in 10 mV increments followed by a repolarizing step to -110 mV. Boltzmann fits were used to obtain the  $V_h$  and k values.
